# Supplementary material
Source: PubMed Central journal article supplement (PMC8391780)
Supplement: jamaotolaryngolheadnecksurg-e212026-s001.pdf [file jamaotolaryngolheadnecksurg-e212026-s001.pdf]

## Supplementary Online Content

Lu R, Aziz NA, Reuter M, Stöcker T, Breteler MMB. Evaluation of the neuroanatomical basis of olfactory dysfunction in the general population. *JAMA Otolaryngol Head Neck Surg*. Published online August 26, 2021. doi:10.1001/jamaoto.2021.2026

**eTable 1.** Exclusion Criteria for Magnetic Resonance Imaging (MRI) in the Rhineland Study

**eTable 2.** The Association of Determinants With Olfactory Function Using Multivariable Linear Regression (n=1915)

**eTable 3.** Relation Between Volumes of Olfactory Brain Structures and Olfactory Function

**eTable 4.** Relation Between Volumes of Central Olfactory Structures and Olfactory Bulb Volume

**eTable 5.** Relation Between Olfactory Bulb Volume and Volumes of Central Olfactory Structures

**eTable 6.** Mediation Effect of Central Olfactory Structure Volumes of the Association Between Olfactory Bulb Volume and Olfactory Function

**eFigure 1.** Coronal and Sagittal Depictions of the Annotated Olfactory Bulb Volumes (OBVs) on T2-Weighted Images

**eFigure 2.** The Optimal Cut-off Points for Detecting Hyposmia and Anosmia Based on Mean OBV

This supplementary material has been provided by the authors to give readers additional information about their work.

**eTable 1.** Exclusion Criteria for Magnetic Resonance Imaging (MRI) in the Rhineland Study

|                                                                                                                                                                                                                                                                                                                                                                                                                                                                                                                                                                                                                                          |
|------------------------------------------------------------------------------------------------------------------------------------------------------------------------------------------------------------------------------------------------------------------------------------------------------------------------------------------------------------------------------------------------------------------------------------------------------------------------------------------------------------------------------------------------------------------------------------------------------------------------------------------|
| <p><b>Absolute contraindications</b></p> <p>Participants with the following conditions are ineligible for MRI:</p> <ul style="list-style-type: none"><li>• Pregnancy</li><li>• Active implant</li><li>• Mechanical contraceptives</li><li>• Undetachable metal or foreign bodies in the body</li><li>• Work- or hobby-related metal processing</li></ul>                                                                                                                                                                                                                                                                                 |
| <p><b>Relative contraindications<sup>a</sup></b></p> <ul style="list-style-type: none"><li>• Artificial joints, vascular prostheses, stents or metal clips, and the like, in the body</li><li>• Heart or head surgery (mainly concerning those with implants)</li></ul> <p>In cases where the participant has a relative contraindication, further steps are taken to clarify whether/ what foreign material has been inserted into the body. For this purpose, documentation of foreign material, or doctor's letters and/or information about the clinic and year of implantation is obtained and assessed by the study physician.</p> |
| <p><b>Refusal to undergo MR imaging</b></p>                                                                                                                                                                                                                                                                                                                                                                                                                                                                                                                                                                                              |

<sup>a</sup> Tattoos were initially considered as contraindication in the beginning of the Rhineland Study but removed later.

**eTable 2.** The Association of Determinants With Olfactory Function Using Multivariable Linear Regression (n=1915)

|                                 | Difference (95% CI) in SIT-12 score  |                                               |                         |                         |
|---------------------------------|--------------------------------------|-----------------------------------------------|-------------------------|-------------------------|
|                                 | With SIT-12 and MRI-derived measures | With SIT-12, MRI-derived measures and smoking | With SIT-12             | With SIT-12 and smoking |
| No. of participants             | 541                                  | 454                                           | 1915                    | 1724                    |
| Age, year                       | -0.04<br>(-0.05, -0.03)              | -0.04<br>(-0.06, -0.03)                       | -0.04<br>(-0.05, -0.04) | -0.04<br>(-0.05, -0.04) |
| Sex: men vs. women              | -0.26<br>(-0.54, 0.02)               | -0.24<br>(-0.55, 0.07)                        | -0.20<br>(-0.34, -0.05) | -0.17<br>(-0.32, -0.02) |
| Nasal patency: blocked vs. free | -0.28<br>(-0.66, 0.09)               | -0.30<br>(-0.71, 0.12)                        | -0.21<br>(-0.41, -0.02) | -0.18<br>(-0.39, 0.02)  |
| Smoking status:                 |                                      |                                               |                         |                         |
| former vs. never                | n/a                                  | 0.18<br>(-0.16, 0.51)                         | n/a                     | 0.04<br>(-0.12, 0.20)   |
| current vs. never               | n/a                                  | 0.06<br>(-0.41, 0.53)                         | n/a                     | 0.01<br>(-0.22, 0.24)   |

Abbreviations: SIT-12, 12-item “Sniffin’ Sticks” odor identification test; OBV, olfactory bulb volume; n/a, not applicable.

**eTable 3.** Relation Between Volumes of Olfactory Brain Structures and Olfactory Function

| Olfactory brain structures <sup>a</sup> | Difference (95% CI) in SIT-12 score <sup>b</sup> |                         |                         |                        |                         |
|-----------------------------------------|--------------------------------------------------|-------------------------|-------------------------|------------------------|-------------------------|
|                                         | volume                                           | age                     | sex                     | volume×age             | volume×sex              |
| <b>Olfactory bulb</b>                   |                                                  |                         |                         |                        |                         |
| Model 1                                 | 0.51<br>(0.38, 0.65)                             | -0.46<br>(-0.60, -0.33) | -0.29<br>(-0.55, -0.02) |                        |                         |
| Model 2                                 | 0.54<br>(0.41, 0.68)                             | -0.44<br>(-0.58, -0.30) | -0.29<br>(-0.56, -0.03) | 0.17<br>(0.03, 0.31)   |                         |
| Model 3                                 | 0.46<br>(0.29, 0.64)                             | -0.44<br>(-0.58, -0.30) | -0.29<br>(-0.56, -0.03) | 0.17<br>(0.03, 0.30)   | 0.19<br>(-0.07, 0.46)   |
| <b>Entorhinal cortex</b>                |                                                  |                         |                         |                        |                         |
| Model 1                                 | -0.03<br>(-0.17, 0.11)                           | -0.58<br>(-0.71, -0.44) | -0.26<br>(-0.54, 0.02)  |                        |                         |
| Model 2                                 | -0.03<br>(-0.17, 0.11)                           | -0.57<br>(-0.71, -0.43) | -0.26<br>(-0.54, 0.02)  | 0.04<br>(-0.12, 0.19)  |                         |
| Model 3                                 | -0.12<br>(-0.31, 0.07)                           | -0.57<br>(-0.71, -0.44) | -0.26<br>(-0.54, 0.02)  | 0.02<br>(-0.14, 0.18)  | 0.20<br>(-0.08, 0.48)   |
| <b>Amygdala</b>                         |                                                  |                         |                         |                        |                         |
| Model 1                                 | 0.09<br>(-0.06, 0.24)                            | -0.54<br>(-0.69, -0.39) | -0.27<br>(-0.55, 0.01)  |                        |                         |
| Model 2                                 | 0.06<br>(-0.09, 0.21)                            | -0.52<br>(-0.67, -0.37) | -0.26<br>(-0.54, 0.02)  | 0.16<br>(0.03, 0.29)   |                         |
| Model 3                                 | -0.01<br>(-0.20, 0.19)                           | -0.52<br>(-0.67, -0.36) | -0.26<br>(-0.54, 0.02)  | 0.17<br>(0.03, 0.30)   | 0.15<br>(-0.13, 0.44)   |
| <b>Parahippocampal cortex</b>           |                                                  |                         |                         |                        |                         |
| Model 1                                 | -0.02<br>(-0.17, 0.12)                           | -0.58<br>(-0.72, -0.44) | -0.27<br>(-0.55, 0.02)  |                        |                         |
| Model 2                                 | -0.04<br>(-0.18, 0.11)                           | -0.56<br>(-0.70, -0.41) | -0.25<br>(-0.54, 0.03)  | 0.17<br>(0.03, 0.31)   |                         |
| Model 3                                 | 0.05<br>(-0.14, 0.24)                            | -0.56<br>(-0.70, -0.42) | -0.27<br>(-0.55, 0.02)  | 0.17<br>(0.03, 0.31)   | -0.20<br>(-0.49, 0.08)  |
| <b>Hippocampus</b>                      |                                                  |                         |                         |                        |                         |
| Model 1                                 | 0.04<br>(-0.12, 0.19)                            | -0.56<br>(-0.71, -0.41) | -0.25<br>(-0.53, 0.04)  |                        |                         |
| Model 2                                 | 0.01<br>(-0.14, 0.16)                            | -0.51<br>(-0.67, -0.36) | -0.24<br>(-0.52, 0.04)  | 0.22<br>(0.08, 0.35)   |                         |
| Model 3                                 | -0.03<br>(-0.22, 0.17)                           | -0.51<br>(-0.67, -0.36) | -0.23<br>(-0.52, 0.05)  | 0.21<br>(0.08, 0.35)   | 0.09<br>(-0.20, 0.37)   |
| <b>Insular cortex</b>                   |                                                  |                         |                         |                        |                         |
| Model 1                                 | -0.05<br>(-0.19, 0.09)                           | -0.58<br>(-0.72, -0.44) | -0.26<br>(-0.54, 0.02)  |                        |                         |
| Model 2                                 | -0.05<br>(-0.19, 0.09)                           | -0.58<br>(-0.72, -0.44) | -0.26<br>(-0.55, 0.02)  | -0.01<br>(-0.14, 0.12) |                         |
| Model 3                                 | -0.02<br>(-0.21, 0.18)                           | -0.58<br>(-0.72, -0.44) | -0.27<br>(-0.55, 0.02)  | -0.01<br>(-0.14, 0.13) | -0.07<br>(-0.34, 0.21)  |
| <b>Lateral orbitofrontal cortex</b>     |                                                  |                         |                         |                        |                         |
| Model 1                                 | -0.04<br>(-0.18, 0.10)                           | -0.58<br>(-0.72, -0.44) | -0.27<br>(-0.55, 0.01)  |                        |                         |
| Model 2                                 | -0.04<br>(-0.18, 0.10)                           | -0.58<br>(-0.72, -0.44) | -0.26<br>(-0.55, 0.02)  | 0.02<br>(-0.12, 0.16)  |                         |
| Model 3                                 | 0.12<br>(-0.07, 0.31)                            | -0.59<br>(-0.73, -0.45) | -0.27<br>(-0.56, 0.01)  | 0.01<br>(-0.13, 0.15)  | -0.35<br>(-0.63, -0.07) |

(continued)

| Olfactory brain structures <sup>a</sup> | Difference (95% CI) in SIT-12 score <sup>b</sup> |                         |                        |                        |                       |
|-----------------------------------------|--------------------------------------------------|-------------------------|------------------------|------------------------|-----------------------|
|                                         | volume                                           | age                     | sex                    | volume×age             | volume×sex            |
| Medial orbitofrontal cortex             |                                                  |                         |                        |                        |                       |
| Model 1                                 | 0.03<br>(-0.11, 0.17)                            | -0.57<br>(-0.71, -0.44) | -0.25<br>(-0.53, 0.03) |                        |                       |
| Model 2                                 | 0.04<br>(-0.10, 0.18)                            | -0.57<br>(-0.71, -0.43) | -0.26<br>(-0.54, 0.02) | -0.08<br>(-0.21, 0.05) |                       |
| Model 3                                 | 0.04<br>(-0.13, 0.21)                            | -0.57<br>(-0.71, -0.43) | -0.26<br>(-0.54, 0.02) | -0.08<br>(-0.21, 0.05) | 0.00<br>(-0.29, 0.30) |

Abbreviation: SIT-12, 12-item "Sniffin' Sticks" odor identification test.

<sup>a</sup> Volumetric measures (including OBV) from the right and left side were averaged, head-size adjusted, and normalized.

<sup>b</sup> Separate multivariable linear regressions were performed for each regional brain volumes with adjustment for age, sex, and nasal patency:

Model 1: SIT-12 ~ volume + age + sex + nasal patency

Model 2: SIT-12 ~ volume + age + sex + nasal patency + volume × age

Model 3: SIT-12 ~ volume + age + sex + nasal patency + volume × age + volume × sex

**eTable 4.** Relation Between Volumes of Central Olfactory Structures and Olfactory Bulb Volume

| Central olfactory structures <sup>a</sup> | Difference (95% CI) in OBV <sup>b</sup> |                         |                       |                        |                        |
|-------------------------------------------|-----------------------------------------|-------------------------|-----------------------|------------------------|------------------------|
|                                           | volume                                  | age                     | sex                   | volume×age             | volume×sex             |
| Entorhinal cortex                         |                                         |                         |                       |                        |                        |
| Model 1                                   | 0.00<br>(-0.08, 0.09)                   | -0.22<br>(-0.31, -0.14) | 0.06<br>(-0.11, 0.22) |                        |                        |
| Model 2                                   | 0.00<br>(-0.08, 0.09)                   | -0.23<br>(-0.31, -0.14) | 0.06<br>(-0.11, 0.22) | -0.03<br>(-0.13, 0.06) |                        |
| Model 3                                   | 0.01<br>(-0.11, 0.12)                   | -0.23<br>(-0.31, -0.14) | 0.06<br>(-0.11, 0.22) | -0.03<br>(-0.13, 0.06) | -0.01<br>(-0.18, 0.16) |
| Amygdala                                  |                                         |                         |                       |                        |                        |
| Model 1                                   | 0.08<br>(-0.01, 0.17)                   | -0.19<br>(-0.28, -0.10) | 0.05<br>(-0.12, 0.22) |                        |                        |
| Model 2                                   | 0.08<br>(-0.01, 0.17)                   | -0.19<br>(-0.29, -0.10) | 0.05<br>(-0.12, 0.22) | -0.02<br>(-0.10, 0.06) |                        |
| Model 3                                   | 0.12<br>(0.01, 0.24)                    | -0.20<br>(-0.29, -0.11) | 0.05<br>(-0.12, 0.22) | -0.02<br>(-0.10, 0.06) | -0.10<br>(-0.26, 0.07) |
| Parahippocampal cortex                    |                                         |                         |                       |                        |                        |
| Model 1                                   | -0.06<br>(-0.15, 0.03)                  | -0.23<br>(-0.32, -0.15) | 0.03<br>(-0.14, 0.20) |                        |                        |
| Model 2                                   | -0.06<br>(-0.15, 0.02)                  | -0.23<br>(-0.31, -0.14) | 0.03<br>(-0.14, 0.21) | 0.03<br>(-0.05, 0.12)  |                        |
| Model 3                                   | -0.04<br>(-0.15, 0.08)                  | -0.23<br>(-0.32, -0.15) | 0.03<br>(-0.14, 0.20) | 0.03<br>(-0.05, 0.12)  | -0.06<br>(-0.23, 0.11) |
| Hippocampus                               |                                         |                         |                       |                        |                        |
| Model 1                                   | 0.11<br>(0.01, 0.20)                    | -0.18<br>(-0.27, -0.09) | 0.09<br>(-0.08, 0.26) |                        |                        |
| Model 2                                   | 0.12<br>(0.02, 0.21)                    | -0.20<br>(-0.29, -0.10) | 0.09<br>(-0.08, 0.26) | -0.07<br>(-0.15, 0.01) |                        |
| Model 3                                   | 0.16<br>(0.04, 0.28)                    | -0.20<br>(-0.29, -0.11) | 0.08<br>(-0.09, 0.25) | -0.07<br>(-0.14, 0.01) | -0.11<br>(-0.28, 0.06) |
| Insular cortex                            |                                         |                         |                       |                        |                        |
| Model 1                                   | 0.12<br>(0.04, 0.21)                    | -0.21<br>(-0.29, -0.13) | 0.07<br>(-0.09, 0.24) |                        |                        |
| Model 2                                   | 0.12<br>(0.04, 0.21)                    | -0.21<br>(-0.30, -0.13) | 0.07<br>(-0.09, 0.24) | 0.01<br>(-0.07, 0.08)  |                        |
| Model 3                                   | 0.12<br>(0.01, 0.24)                    | -0.21<br>(-0.30, -0.13) | 0.07<br>(-0.09, 0.24) | 0.01<br>(-0.07, 0.08)  | 0.00<br>(-0.17, 0.16)  |
| Lateral orbitofrontal cortex              |                                         |                         |                       |                        |                        |
| Model 1                                   | 0.02<br>(-0.06, 0.11)                   | -0.22<br>(-0.30, -0.14) | 0.06<br>(-0.11, 0.23) |                        |                        |
| Model 2                                   | 0.03<br>(-0.06, 0.11)                   | -0.22<br>(-0.30, -0.14) | 0.07<br>(-0.10, 0.24) | 0.05<br>(-0.03, 0.13)  |                        |
| Model 3                                   | 0.04<br>(-0.07, 0.15)                   | -0.22<br>(-0.30, -0.14) | 0.07<br>(-0.10, 0.24) | 0.05<br>(-0.03, 0.13)  | -0.03<br>(-0.20, 0.13) |
| Medial orbitofrontal cortex               |                                         |                         |                       |                        |                        |
| Model 1                                   | 0.09<br>(0.01, 0.17)                    | -0.22<br>(-0.30, -0.14) | 0.07<br>(-0.10, 0.24) |                        |                        |
| Model 2                                   | 0.10<br>(0.01, 0.18)                    | -0.22<br>(-0.30, -0.13) | 0.07<br>(-0.10, 0.23) | -0.04<br>(-0.12, 0.04) |                        |
| Model 3                                   | 0.10<br>(0.00, 0.20)                    | -0.22<br>(-0.30, -0.13) | 0.07<br>(-0.10, 0.23) | -0.04<br>(-0.12, 0.04) | -0.01<br>(-0.18, 0.17) |

Abbreviation: SIT-12, 12-item "Sniffin' Sticks" odor identification test.

<sup>a</sup> Volumetric measures (including OBV) from the right and left side were averaged, head-size adjusted, and normalized.

<sup>b</sup> Separate multivariable linear regressions were performed for each regional brain volumes with adjustment for age, sex, and nasal patency:

Model 1: OBV ~ central olfactory volume + age + sex + nasal patency

Model 2: OBV ~ central olfactory volume + age + sex + nasal patency + central olfactory volume × age

Model 3: OBV ~ central olfactory volume + age + sex + nasal patency + central olfactory volume × age + central olfactory volume × sex

**eTable 5.** Relation Between Olfactory Bulb Volume and Volumes of Central Olfactory Structures

|                                     | Difference (95% CI) in central olfactory structure <sup>a,b</sup> |                         |                         |                        |                        |
|-------------------------------------|-------------------------------------------------------------------|-------------------------|-------------------------|------------------------|------------------------|
|                                     | OBV                                                               | age                     | sex                     | OBV × age              | OBV × sex              |
| <b>Entorhinal cortex</b>            |                                                                   |                         |                         |                        |                        |
| Model 1                             | 0.00<br>(-0.08, 0.09)                                             | -0.02<br>(-0.11, 0.07)  | -0.02<br>(-0.19, 0.16)  |                        |                        |
| Model 2                             | 0.00<br>(-0.09, 0.09)                                             | -0.02<br>(-0.11, 0.06)  | -0.02<br>(-0.19, 0.16)  | -0.02<br>(-0.11, 0.07) |                        |
| Model 3                             | 0.00<br>(-0.11, 0.12)                                             | -0.02<br>(-0.11, 0.06)  | -0.02<br>(-0.19, 0.16)  | -0.02<br>(-0.11, 0.07) | -0.01<br>(-0.18, 0.17) |
| <b>Amygdala</b>                     |                                                                   |                         |                         |                        |                        |
| Model 1                             | 0.07<br>(-0.01, 0.15)                                             | -0.38<br>(-0.46, -0.30) | 0.09<br>(-0.07, 0.24)   |                        |                        |
| Model 2                             | 0.07<br>(-0.01, 0.15)                                             | -0.38<br>(-0.46, -0.30) | 0.09<br>(-0.07, 0.24)   | 0.02<br>(-0.06, 0.10)  |                        |
| Model 3                             | 0.11<br>(0.00, 0.21)                                              | -0.38<br>(-0.46, -0.30) | 0.09<br>(-0.07, 0.24)   | 0.02<br>(-0.06, 0.10)  | -0.08<br>(-0.24, 0.08) |
| <b>Parahippocampal cortex</b>       |                                                                   |                         |                         |                        |                        |
| Model 1                             | -0.06<br>(-0.14, 0.03)                                            | -0.18<br>(-0.26, -0.09) | -0.42<br>(-0.58, -0.26) |                        |                        |
| Model 2                             | -0.05<br>(-0.14, 0.03)                                            | -0.17<br>(-0.26, -0.09) | -0.42<br>(-0.59, -0.26) | 0.04<br>(-0.05, 0.12)  |                        |
| Model 3                             | -0.04<br>(-0.15, 0.07)                                            | -0.17<br>(-0.26, -0.09) | -0.42<br>(-0.59, -0.26) | 0.04<br>(-0.05, 0.12)  | -0.03<br>(-0.20, 0.13) |
| <b>Hippocampus</b>                  |                                                                   |                         |                         |                        |                        |
| Model 1                             | 0.09<br>(0.01, 0.17)                                              | -0.38<br>(-0.46, -0.30) | -0.32<br>(-0.47, -0.16) |                        |                        |
| Model 2                             | 0.09<br>(0.01, 0.17)                                              | -0.38<br>(-0.46, -0.30) | -0.32<br>(-0.47, -0.16) | -0.03<br>(-0.11, 0.06) |                        |
| Model 3                             | 0.12<br>(0.02, 0.22)                                              | -0.38<br>(-0.46, -0.31) | -0.31<br>(-0.47, -0.16) | -0.03<br>(-0.11, 0.06) | -0.09<br>(-0.24, 0.07) |
| <b>Insular cortex</b>               |                                                                   |                         |                         |                        |                        |
| Model 1                             | 0.13<br>(0.04, 0.21)                                              | -0.07<br>(-0.16, 0.01)  | -0.13<br>(-0.30, 0.04)  |                        |                        |
| Model 2                             | 0.13<br>(0.04, 0.22)                                              | -0.07<br>(-0.16, 0.01)  | -0.13<br>(-0.30, 0.04)  | 0.00<br>(-0.09, 0.09)  |                        |
| Model 3                             | 0.09<br>(-0.02, 0.21)                                             | -0.07<br>(-0.16, 0.01)  | -0.13<br>(-0.30, 0.04)  | 0.00<br>(-0.09, 0.08)  | 0.08<br>(-0.09, 0.25)  |
| <b>Lateral orbitofrontal cortex</b> |                                                                   |                         |                         |                        |                        |
| Model 1                             | 0.02<br>(-0.06, 0.11)                                             | -0.17<br>(-0.26, -0.09) | -0.22<br>(-0.38, -0.05) |                        |                        |
| Model 2                             | 0.03<br>(-0.06, 0.12)                                             | -0.17<br>(-0.25, -0.08) | -0.22<br>(-0.38, -0.05) | 0.04<br>(-0.05, 0.13)  |                        |
| Model 3                             | 0.03<br>(-0.08, 0.15)                                             | -0.17<br>(-0.25, -0.08) | -0.22<br>(-0.39, -0.05) | 0.04<br>(-0.05, 0.13)  | -0.01<br>(-0.18, 0.16) |
| <b>Medial orbitofrontal cortex</b>  |                                                                   |                         |                         |                        |                        |
| Model 1                             | 0.10<br>(0.01, 0.18)                                              | -0.01<br>(-0.09, 0.08)  | -0.15<br>(-0.32, 0.02)  |                        |                        |
| Model 2                             | 0.09<br>(0.00, 0.18)                                              | -0.01<br>(-0.10, 0.07)  | -0.15<br>(-0.32, 0.02)  | -0.04<br>(-0.13, 0.04) |                        |
| Model 3                             | 0.10<br>(-0.02, 0.21)                                             | -0.01<br>(-0.10, 0.07)  | -0.15<br>(-0.32, 0.02)  | -0.04<br>(-0.13, 0.05) | -0.02<br>(-0.19, 0.15) |



Abbreviation: OBV, olfactory bulb volume

<sup>a</sup> Volumetric measures (including OBV) from the right and left side were averaged, head-size adjusted, and normalized.

<sup>b</sup> Separate multivariable linear regressions were performed for each regional brain volumes with adjustment for age, sex, and nasal patency:

Model 1: central olfactory volume ~ OBV + age + sex + nasal patency

Model 2: central olfactory volume ~ OBV + age + sex + nasal patency + OBV × age

Model 3: central olfactory volume ~ OBV + age + sex + nasal patency + OBV × age + OBV × sex

**eTable 6.** Mediation Effect of Central Olfactory Structure Volumes of the Association Between Olfactory Bulb Volume and Olfactory Function<sup>a</sup>

| Volume <sup>b</sup> of      | Models <sup>c, d</sup> | Indirect effect            | Direct effect           | Total effect            | Moderated mediation index <sup>e</sup> |
|-----------------------------|------------------------|----------------------------|-------------------------|-------------------------|----------------------------------------|
| Amygdala                    | Model A                | 0.003<br>(-0.005, 0.024)   | 0.508<br>(0.342, 0.711) | 0.512<br>(0.344, 0.714) |                                        |
|                             | Model B                |                            |                         |                         | 0.010<br>(0.000, 0.031)                |
|                             | 1-SD below             | -0.009<br>(-0.034, 0.001)  | 0.394<br>(0.175, 0.628) | 0.385<br>(0.166, 0.623) |                                        |
|                             | mean age               | 0.001<br>(-0.007, 0.018)   | 0.539<br>(0.363, 0.743) | 0.540<br>(0.362, 0.747) |                                        |
|                             | 1-SD above             | 0.012<br>(-0.002, 0.045)   | 0.683<br>(0.404, 0.982) | 0.695<br>(0.405, 0.992) |                                        |
| Hippocampus                 | Model A                | -0.001<br>(-0.019, 0.012)  | 0.513<br>(0.348, 0.715) | 0.512<br>(0.344, 0.714) |                                        |
|                             | Model B                |                            |                         |                         | 0.022<br>(0.007, 0.051)                |
|                             | 1-SD below             | -0.026<br>(-0.063, -0.007) | 0.429<br>(0.203, 0.660) | 0.403<br>(0.187, 0.643) |                                        |
|                             | mean age               | -0.004<br>(-0.024, 0.007)  | 0.556<br>(0.378, 0.765) | 0.552<br>(0.377, 0.762) |                                        |
|                             | 1-SD above             | 0.017<br>(-0.001, 0.055)   | 0.683<br>(0.405, 0.973) | 0.701<br>(0.415, 0.996) |                                        |
| Insular cortex              | Model A                | -0.014<br>(-0.041, 0.003)  | 0.526<br>(0.355, 0.725) | 0.512<br>(0.344, 0.714) |                                        |
|                             | Model B                |                            |                         |                         | -0.003<br>(-0.025, 0.014)              |
|                             | 1-SD below             | -0.011<br>(-0.039, 0.005)  | 0.389<br>(0.164, 0.626) | 0.378<br>(0.156, 0.612) |                                        |
|                             | mean age               | -0.014<br>(-0.039, 0.002)  | 0.558<br>(0.377, 0.764) | 0.544<br>(0.360, 0.747) |                                        |
|                             | 1-SD above             | -0.017<br>(-0.061, 0.009)  | 0.727<br>(0.417, 1.038) | 0.710<br>(0.397, 1.008) |                                        |
| Medial orbitofrontal cortex | Model A                | -0.002<br>(-0.026, 0.014)  | 0.513<br>(0.339, 0.703) | 0.512<br>(0.344, 0.714) |                                        |
|                             | Model B                |                            |                         |                         | -0.007<br>(-0.041, 0.006)              |
|                             | 1-SD below             | 0.006<br>(-0.009, 0.038)   | 0.372<br>(0.156, 0.601) | 0.378<br>(0.163, 0.620) |                                        |
|                             | mean age               | 0.000<br>(-0.019, 0.017)   | 0.542<br>(0.363, 0.736) | 0.541<br>(0.362, 0.748) |                                        |
|                             | 1-SD above             | -0.007<br>(-0.056, 0.014)  | 0.711<br>(0.402, 1.006) | 0.704<br>(0.401, 1.004) |                                        |

<sup>a</sup> The data are expressed as estimate (95% CI).

<sup>b</sup> Separate mediation analyses (OBV as the independent variable, the volume of each central olfactory structure as the mediator and SIT-12 as the outcome variable) were performed for each central olfactory structures. Volumetric measures (including OBV) from the right and left side were averaged, head-size adjusted and normalized.

<sup>c</sup> Model A: without age as a moderator; Model B: with age as a moderator.

<sup>d</sup> The estimate (95% CI) of moderated mediation analysis was reported for mean age and 1-SD below or above the mean age.

<sup>e</sup> The moderated mediation index and interaction effects were presented only for Model B.

**eFigure 1.** Coronal and Sagittal Depictions of the Annotated Olfactory Bulb Volumes (OBVs) on T2-Weighted Images

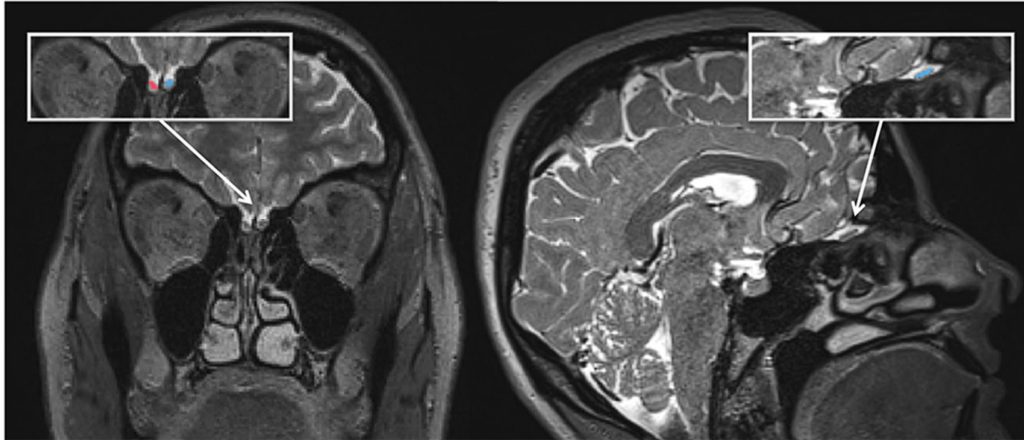

Abbreviation: OBV, olfactory bulb volume.  
The left and right OBV are labeled in blue and red, respectively.

**eFigure 2.** The Optimal Cut-off Points for Detecting Hyposmia and Anosmia Based on Mean OBV

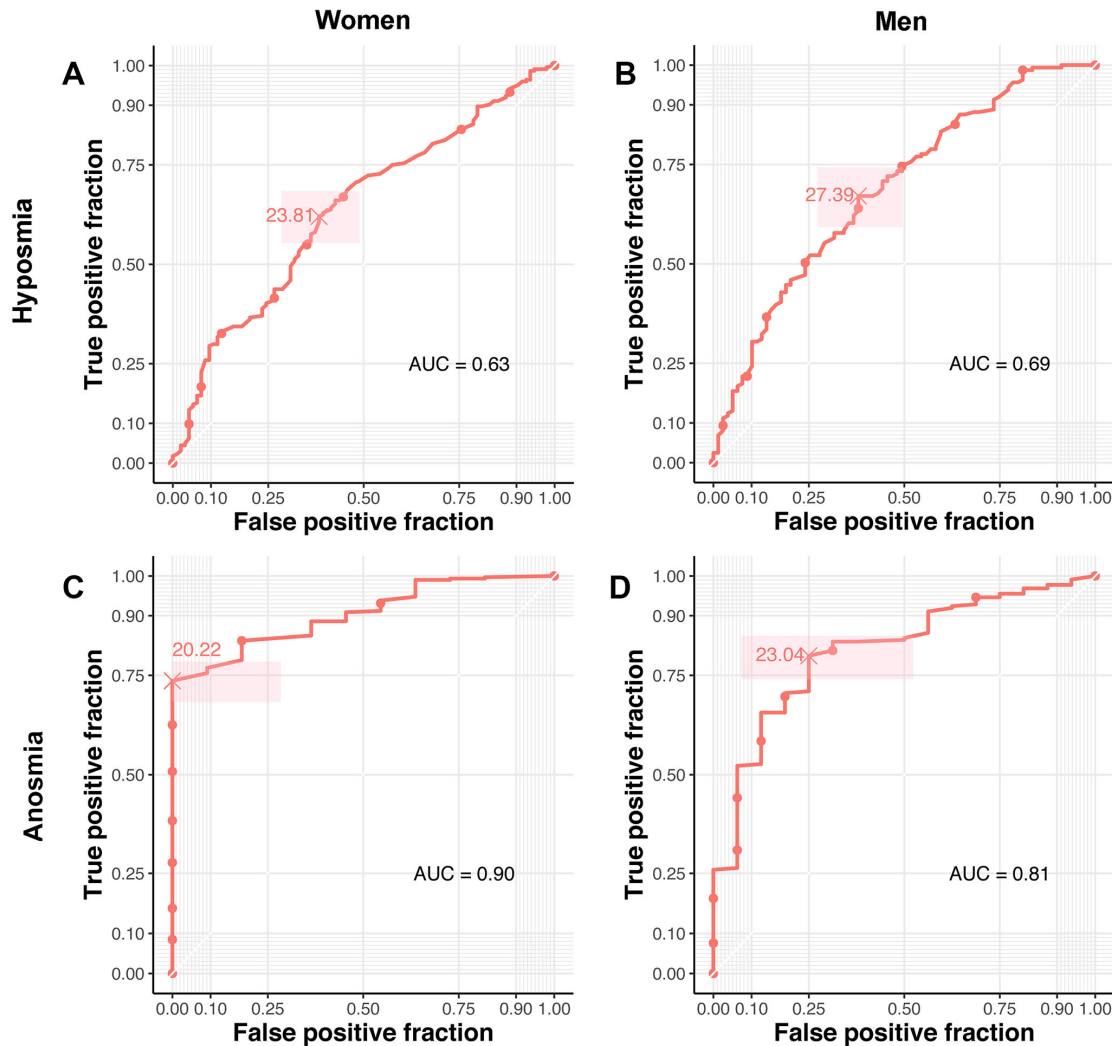

Abbreviations: OBV, olfactory bulb volume; AUC, area under the curve. Using Youden's index, the optimal cut-off points for detecting hyposmia (defined as a SIT-12 score of 9 or lower) based on mean OBV were  $\leq 23.81 \text{ mm}^3$  for females and  $\leq 27.39 \text{ mm}^3$  for males. These values corresponded to areas under the curve (AUC) of the receiver operating characteristic (ROC) curve of 0.63 (95% CI: 0.57 to 0.70) for females, and 0.69 (95% CI: 0.62 to 0.76) for males, respectively (**eFigure 2A** and **B**). Similarly, the optimal cut-off points for detecting anosmia (defined as a SIT-12 score of 6 or lower) based on mean OBV were  $\leq 20.22 \text{ mm}^3$  for females and  $\leq 23.04 \text{ mm}^3$  for males. These values corresponded to AUCs of the ROC curve of 0.90 (95% CI: 0.85 to 0.96) for females, and 0.81 (95% CI: 0.73 to 0.90) for males, respectively (**eFigure 2C** and **D**). The optimal cut-off point is indicated by a cross and the pink rectangle around this point represents the corresponding 95% CIs for the true and false positive fractions.
